# Supplementary material
Source: MDPI journal article supplement (https://www.mdpi.com/2075-163X/12/7/898)
Supplement: s1 [file s1]

# Supplementary Materials: Characterization and Toxicity Analysis of Lab Created Respirable Coal Mine Dust from the Appalachians and Rocky Mountains Regions

Vanessa Salinas, Milton Das, Quiteria Jacquez, Alexandra Camacho, Katherine Zychowski, Mark Hovingh, Alexander Medina, Gayan Rubasinghege, Mohammad Rezaee, Jonas Baltrisaitis, Neal Fairley and Pedram Roghanchi

## 1. Supplementary Information

The following supporting information is provided in the current document, Table S1: Composition of the SLFs used; Table S2: Percentages of the relative mineral abundance, total counts, and counts per mineral in XRD data; Table S3: SRM verification ( $\mu\text{g/g}$ ); Table S4. Percentage dissolves from the initial availability of the elements (dissolved/available); Figure S1. Elemental content of the sample in same scale; Figure S2. Mass and surface area normalized dissolution of metals as a function of time in GS from (a) Mine 1, (b) Mine 2, (c) Mine 3, (d) Mine 4, and (e) Mine 5; Figure S3. Mass and surface area normalized dissolution of metals as a function of time in ALF from (a) Mine 1, (b) Mine 2, (c) Mine 3, (d) Mine 4, and (e) Mine 5.

**Table S1.** Composition of the SLFs used [9,22].

| Composition                          | Gamble Solution (GS) | Artificial Lysosomal Fluid (ALF) |
|--------------------------------------|----------------------|----------------------------------|
|                                      | g/L                  | g/L                              |
| NaCl                                 | 6.779                | 3.21                             |
| Na <sub>2</sub> HPO <sub>4</sub>     | -                    | 0.071                            |
| NaHCO <sub>3</sub>                   | 2.268                | -                                |
| Sodium citrate dehydrate             | 0.055                | 0.077                            |
| NH <sub>4</sub> Cl                   | 0.535                | -                                |
| Glycine                              | 0.375                | 0.059                            |
| NaH <sub>2</sub> PO <sub>4</sub>     | 1.872                | -                                |
| L-Cysteine                           | 0.121                | -                                |
| NaOH                                 | -                    | 6                                |
| Citric acid                          | -                    | 20.8                             |
| CaCl <sub>2</sub> ·2H <sub>2</sub> O | 0.026                | 0.128                            |
| Na <sub>2</sub> SO <sub>4</sub>      | -                    | 0.039                            |
| MgCl <sub>2</sub> ·6H <sub>2</sub> O | -                    | 0.05                             |
| Disodium tartrate                    | -                    | 0.09                             |
| Sodium lactate                       | -                    | 0.085                            |
| Sodium pyruvate                      | -                    | 0.172                            |

**Table S2.** Percentages of the relative mineral abundance, total counts, and counts per mineral in XRD data.

| Mineral   | Counts of major peak |         |        |        |        | Peak position (°2θ) |
|-----------|----------------------|---------|--------|--------|--------|---------------------|
|           | Mine 1               | Mine 2  | Mine 3 | Mine 4 | Mine 5 |                     |
| Quartz    | 2167.11              | 1316.02 | 3266.8 | 1626.2 | 564.32 | 26.65°              |
| Kaolinite | 341.11               | 394.53  | 697.91 | 609.89 | 312.64 | 12.38°              |
| Pyrite    | 885.48               | 81.46   | 657.47 | 942.21 | 0      | 33.04°              |
| Siderite  | 0                    | 81.53   | 0      | 0      | 0      | 32.02°              |
| Calcite   | 0                    | 0       | 138    | 0      | 0      | 29.44°              |

**Table S3.** SRM verification ( $\mu\text{g/g}$ ).

| Element                 | Li   | Mg      | Al   | Si    | K    | Ca   | Ti    | V     | Cr   | Mn   | Fe     | Ni    | Cu   | As     | Ba     | Pb    |
|-------------------------|------|---------|------|-------|------|------|-------|-------|------|------|--------|-------|------|--------|--------|-------|
| SRM CLB-1 Digested      | 5.7  | 157.5   | 6815 | 10465 | 440  | 1095 | 452   | 12.24 | 9.29 | 8.4  | 8309.6 | 18.1  | 8.5  | 13.6   | 31.6   | 5.1   |
| SRM CLB-1 Information   | 8.0  | 279.133 | 7991 | 11734 | 631  | 1572 | 467   | 12.0  | 9.70 | 8.0  | 8742.5 | 18.0  | 10.0 | 13.000 | 34.000 | 5.100 |
| Allowable error         | N.R. | 18      | 212  | 982   | 41.5 | 71.5 | 18    | 1     | 1.2  | N.R. | 350    | 2     | N.R. | N.R.   | 5.000  | 0.700 |
| Difference              | 2.31 | 122     | 1176 | 1269  | 191  | 477  | 15.45 | -0.24 | 0.41 | -0.4 | 432.9  | -0.10 | 1.52 | -0.56  | 2.371  | 0.033 |
| Relative difference (%) | 29%  | 44%     | 15%  | 11%   | 30%  | 30%  | 3%    | -2%   | 4%   | -4%  | 5%     | -1%   | 15%  | -4%    | 7%     | 1%    |

**Table S4.** Percentage dissolves from the initial availability of the elements (dissolved/available).

| Mine ID | Al      |         | Si      |         | Fe      |         | Cu      |         | Sr      |    | Pb      |    |
|---------|---------|---------|---------|---------|---------|---------|---------|---------|---------|----|---------|----|
|         | ALF     | GS      | ALF     | GS      | ALF     | GS      | ALF     | GS      | ALF     | GS | ALF     | GS |
| Mine 1  | 0.0350% | 0.0022% | 0.0284% | 0.4745% | 0.0902% | -       | 1.4014% | 1.5558% | 0.0652% | -  | 0.7853% | -  |
| Mine 2  | 0.0283% | 0.0076% | 0.0259% | 0.4793% | 0.4076% | 0.0004% | 3.7256% | 5.9179% | 1.8139% | -  | 0.4677% | -  |
| Mine 3  | 0.0347% | 0.0023% | 0.0130% | 0.1131% | 0.0893% | -       | 1.7373% | 1.2010% | 0.4585% | -  | 0.2867% | -  |
| Mine 4  | 0.0187% | 0.0045% | 0.0156% | 0.2055% | 0.1443% | 0.0028% | 2.3777% | 5.7885% | 0.1566% | -  | 0.2586% | -  |
| Mine 5  | 0.0376% | 0.0025% | 0.0306% | 1.4618% | 0.1309% | -       | 1.4431% | 2.3560% | 0.2687% | -  | 0.5321% | -  |

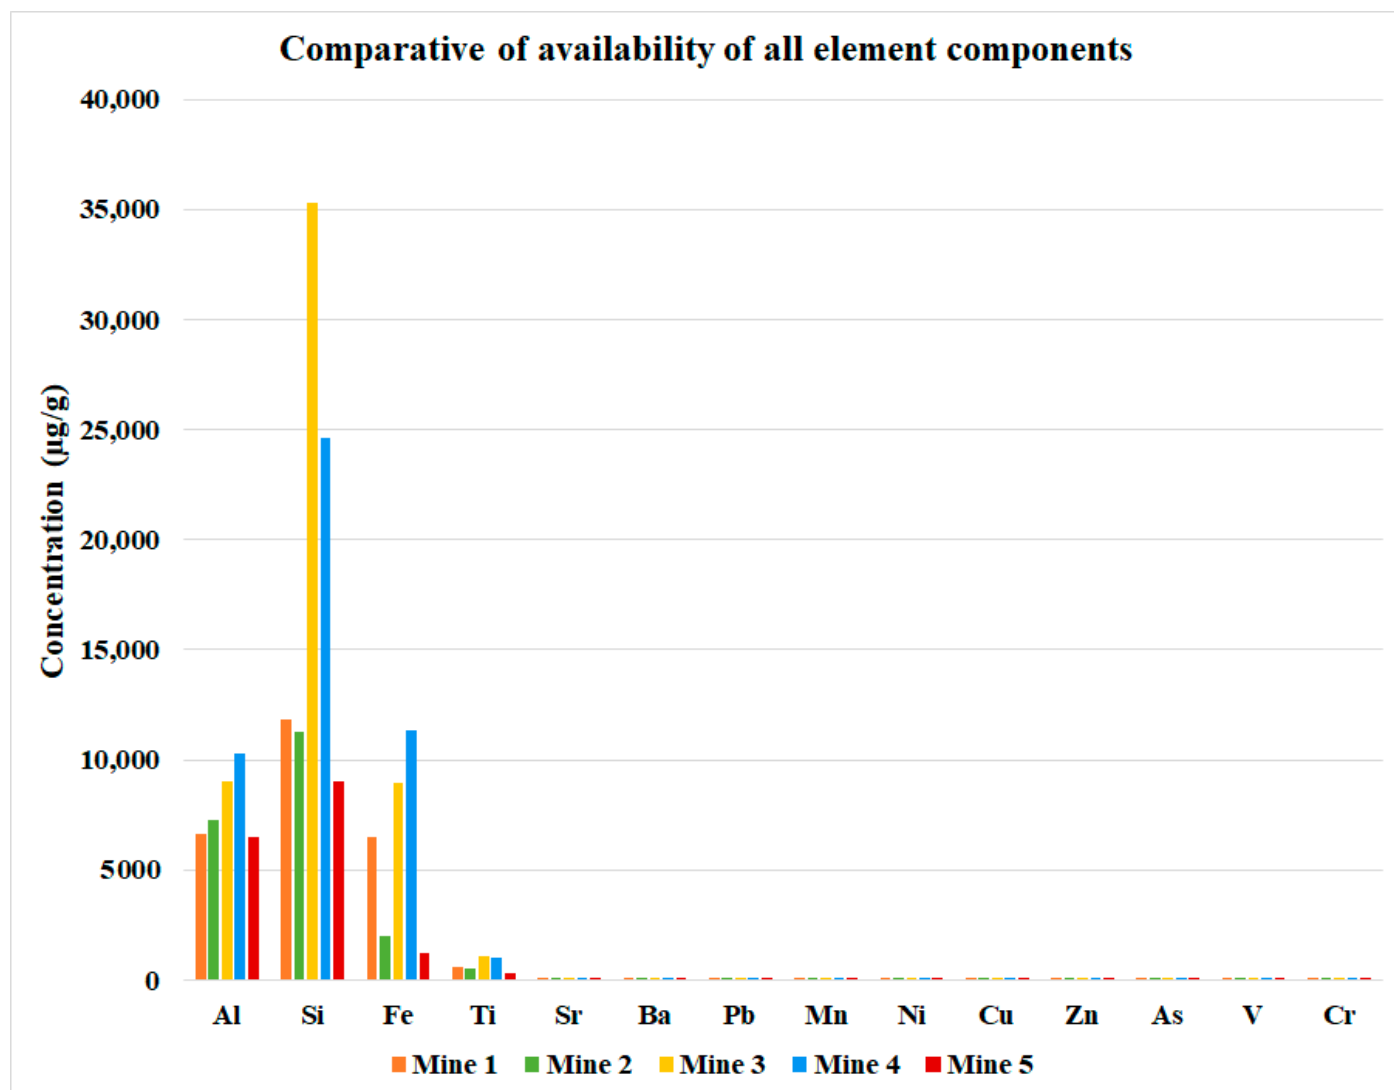**Figure S1.** Elemental content of the sample in same scale.

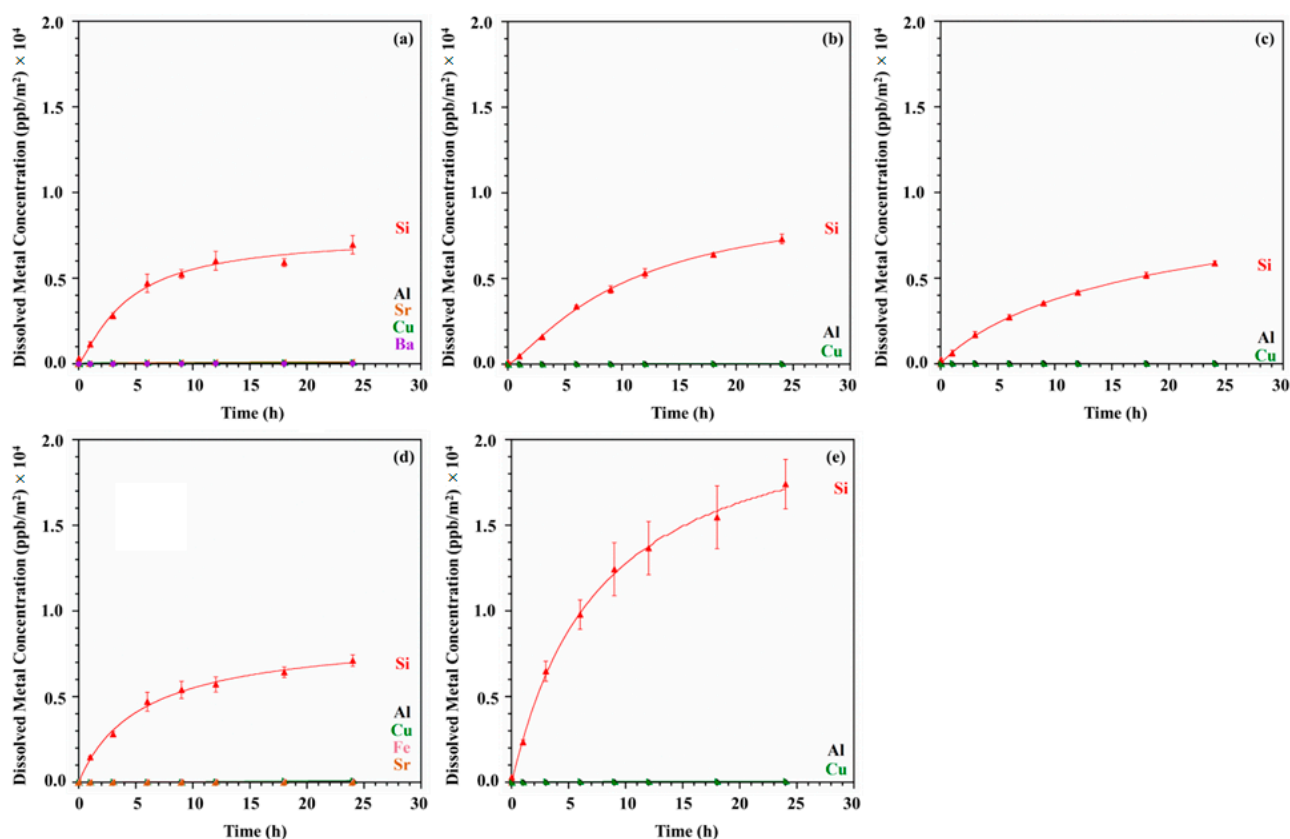

**Figure S2.** Mass and surface area normalized dissolution of metals as a function of time in GS from (a) Mine 1, (b) Mine 2, (c) Mine 3, (d) Mine 4, and (e) Mine 5.

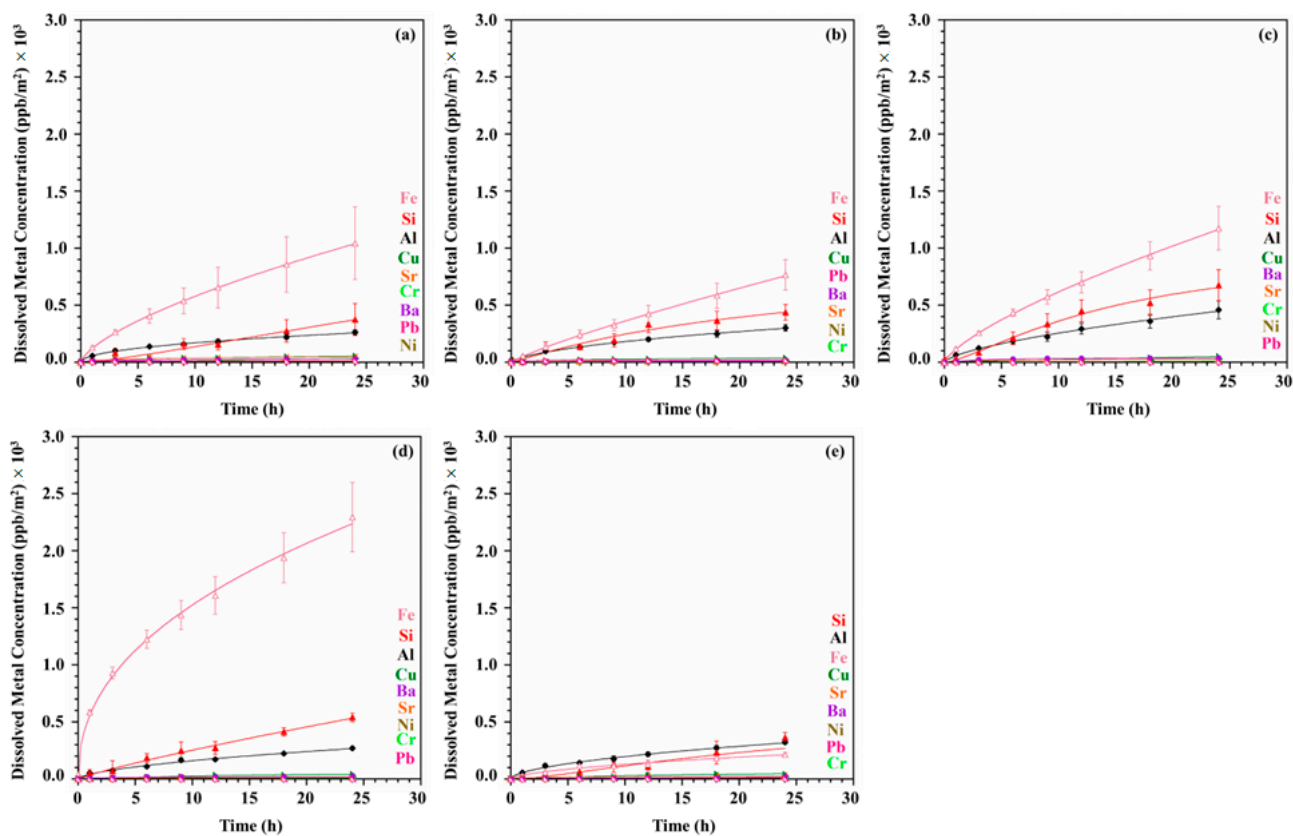

**Figure S3.** Mass and surface area normalized dissolution of metals as a function of time in ALF from (a) Mine 1, (b) Mine 2, (c) Mine 3, (d) Mine 4, and (e) Mine 5.
